# Supplementary material
Source: PubMed Central journal article supplement (PMC9839773)
Supplement: 42003_2023_4431_MOESM2_ESM.pdf [file 42003_2023_4431_MOESM2_ESM.pdf]

## **SUPPLEMENTARY INFORMATION**

### **The neoepitope of the complement C5b-9 Membrane Attack Complex is formed by proximity of adjacent ancillary regions of C9**

Charles Bayly-Jones\*<sup>1,2</sup>, Bill H.T. Ho\*<sup>1</sup>, Corinna Lau<sup>3</sup>, Eleanor W.W. Leung<sup>1</sup>, Laura D'Andrea<sup>1</sup>, Christopher J. Lupton<sup>1</sup>, Susan M. Ekkel<sup>1</sup>, Hariprasad Venugopal<sup>4</sup>, James C. Whisstock<sup>1,2,5</sup>, Tom E. Mollnes<sup>3,6,7</sup>, Bradley A. Spicer<sup>1,2#</sup>, Michelle A. Dunstone<sup>1#</sup>

<sup>1</sup>Biomedicine Discovery Institute, Department of Biochemistry and Molecular Biology, Monash University, Melbourne, Australia.

<sup>2</sup>ARC Centre of Excellence in Advanced Molecular Imaging, Monash University, Melbourne, Australia.

<sup>3</sup>Research laboratory, Nordland Hospital Trust, Bodø, Norway.

<sup>4</sup>Ramaciotti Centre for Cryo-Electron Microscopy, Monash University, Clayton 3800, Victoria, Australia

<sup>5</sup>EMBL Australia, Monash University, Melbourne, VIC, 3800, Australia.

<sup>6</sup>Institute of Immunology, Oslo University Hospital and University of Oslo, Oslo, Norway.

<sup>7</sup>Centre of Molecular Inflammation Research, Norwegian University of Science and Technology, Trondheim, Norway.

\*These authors contributed equally

#Correspondence to [bradley.spicer@monash.edu](mailto:bradley.spicer@monash.edu) or [michelle.dunstone@monash.edu](mailto:michelle.dunstone@monash.edu)

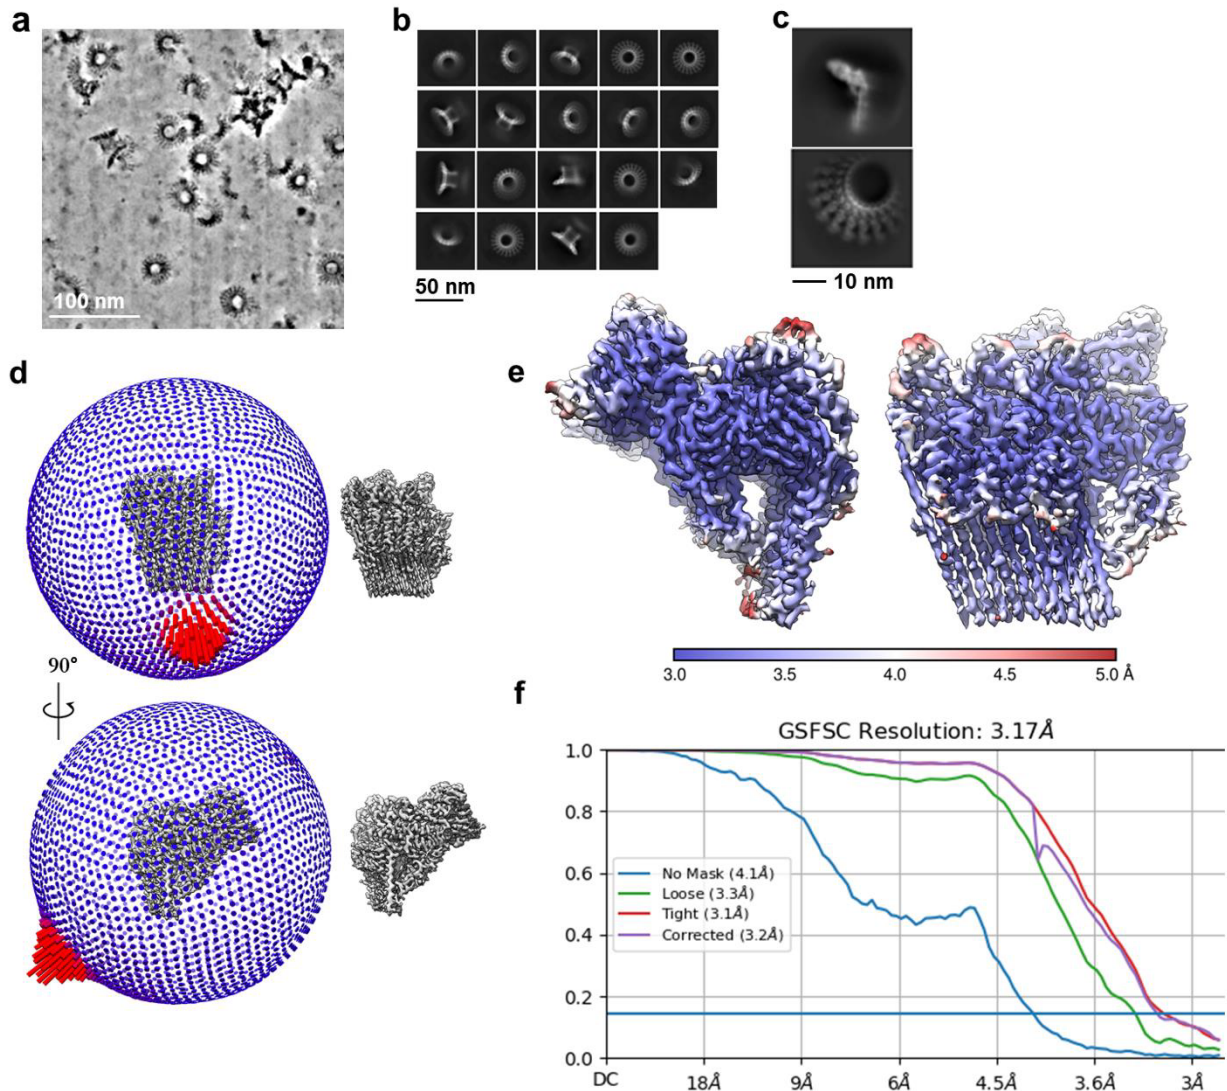

**Supp Figure 1. Electron microscopy of polyC9 in complex with aE11-Fab.** **a.** Raw denoised cryo-electron micrograph of polyC9 in complex with aE11. **b.** Two-dimensional class averages of whole aE11-Fab/polyC9 complex. **c.** Sub-particle 2D class averages of localised segment of the aE11-Fab/polyC9 complex. **d.** Angular distribution of viewing orientations and corresponding isosurface rendering of the final reconstruction. **e.** Local resolution isosurface rendering showing centrally located high resolution features, including the aE11-Fab/polyC9 binding interface. **f.** Gold-standard Fourier shell correlation (GSFSC) plot and estimate of (masked) global resolution.

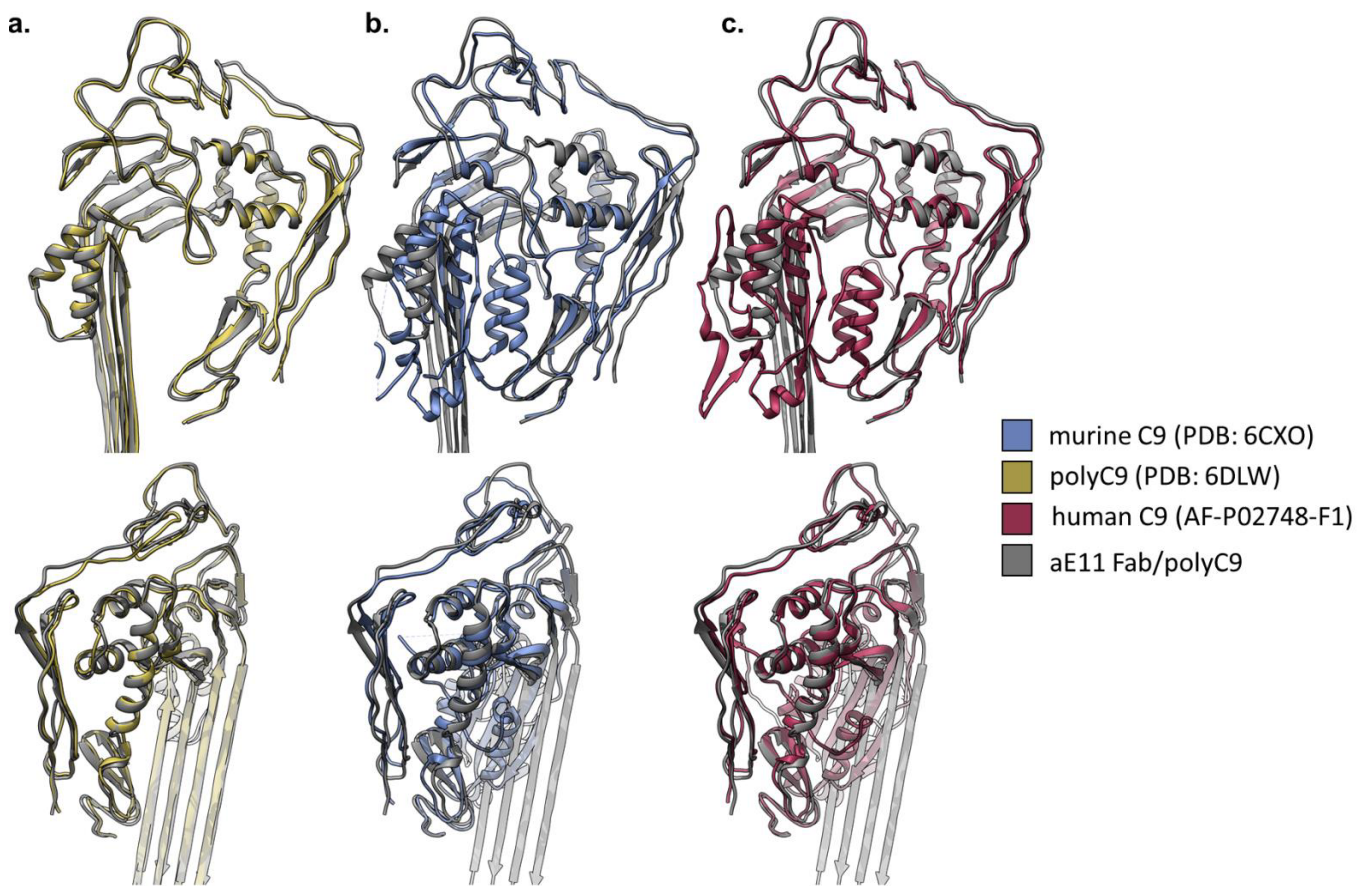

**Supp Figure 2. Structural superposition of C9 shows no major conformational differences in the aE11 binding region. a.** Comparison of polyC9 without (yellow) and with (grey) bound aE11. **b.** Murine C9 crystal structure (PDB 6CXO) superimposed on aE11-Fab bound polyC9 shows minor shifts in the thrombospondin and low-density lipoprotein receptor A (TSP/LDLRA) region of C9. **c.** AlphaFold model of monomeric human C9 superimposed on aE11-Fab bound polyC9 is consistent with murine C9 crystal structure and shows little to no differences in conformation<sup>1</sup>.



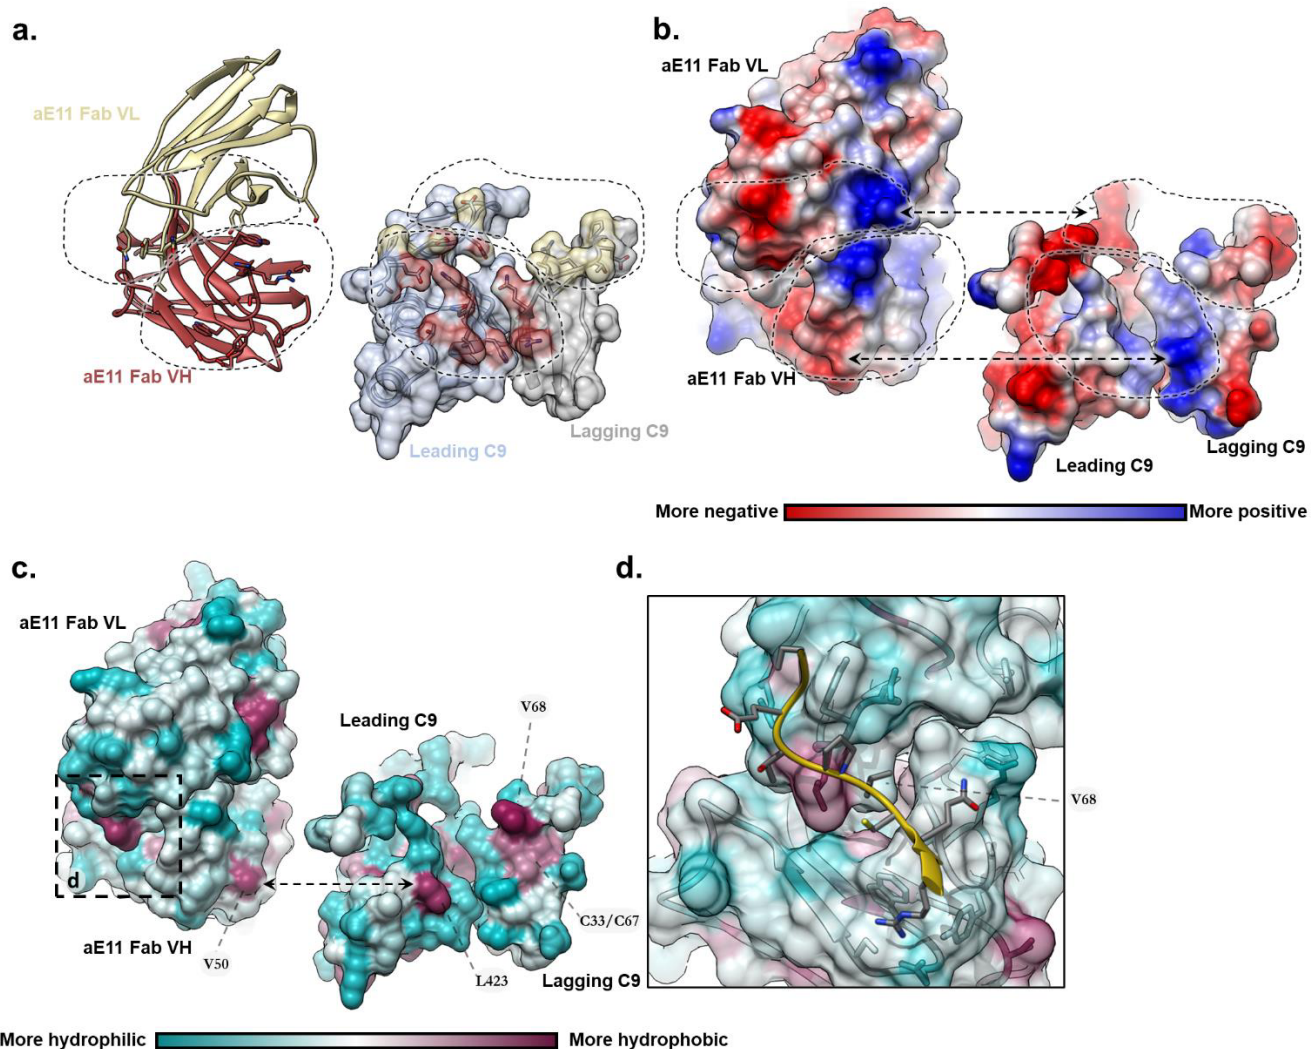

**Supp Figure 3. Structural analysis of aE11-Fab/polyC9 interface.** **a.** Cartoon and surface representations of the aE11-CDRs and the C9 epitope respectively. The footprint of the aE11-CDRs is shaded on the C9 epitope by the colour of the aE11 chains. **b.** Identical views from (a) with coulombic surface colouring. Distinct charge complementarity is present between the aE11-CDR and the C9 epitope. Two dominantly charged interfaces are observed. **c.** Identical views from (a) with surface hydrophobicity colouring. Two hydrophobic regions are present on the C9 epitope predominantly defined by L423 and V68. Double headed arrow indicates interacting residues. **d.** Boxed region from (c) showing a small region of the lagging C9 TSP domain (yellow cartoon; contributing to the hydrophobic surface region shown in [c.]) that is sheltered by the aE11 CDR H3 and L3 groove (surface rendering coloured by hydrophobicity).

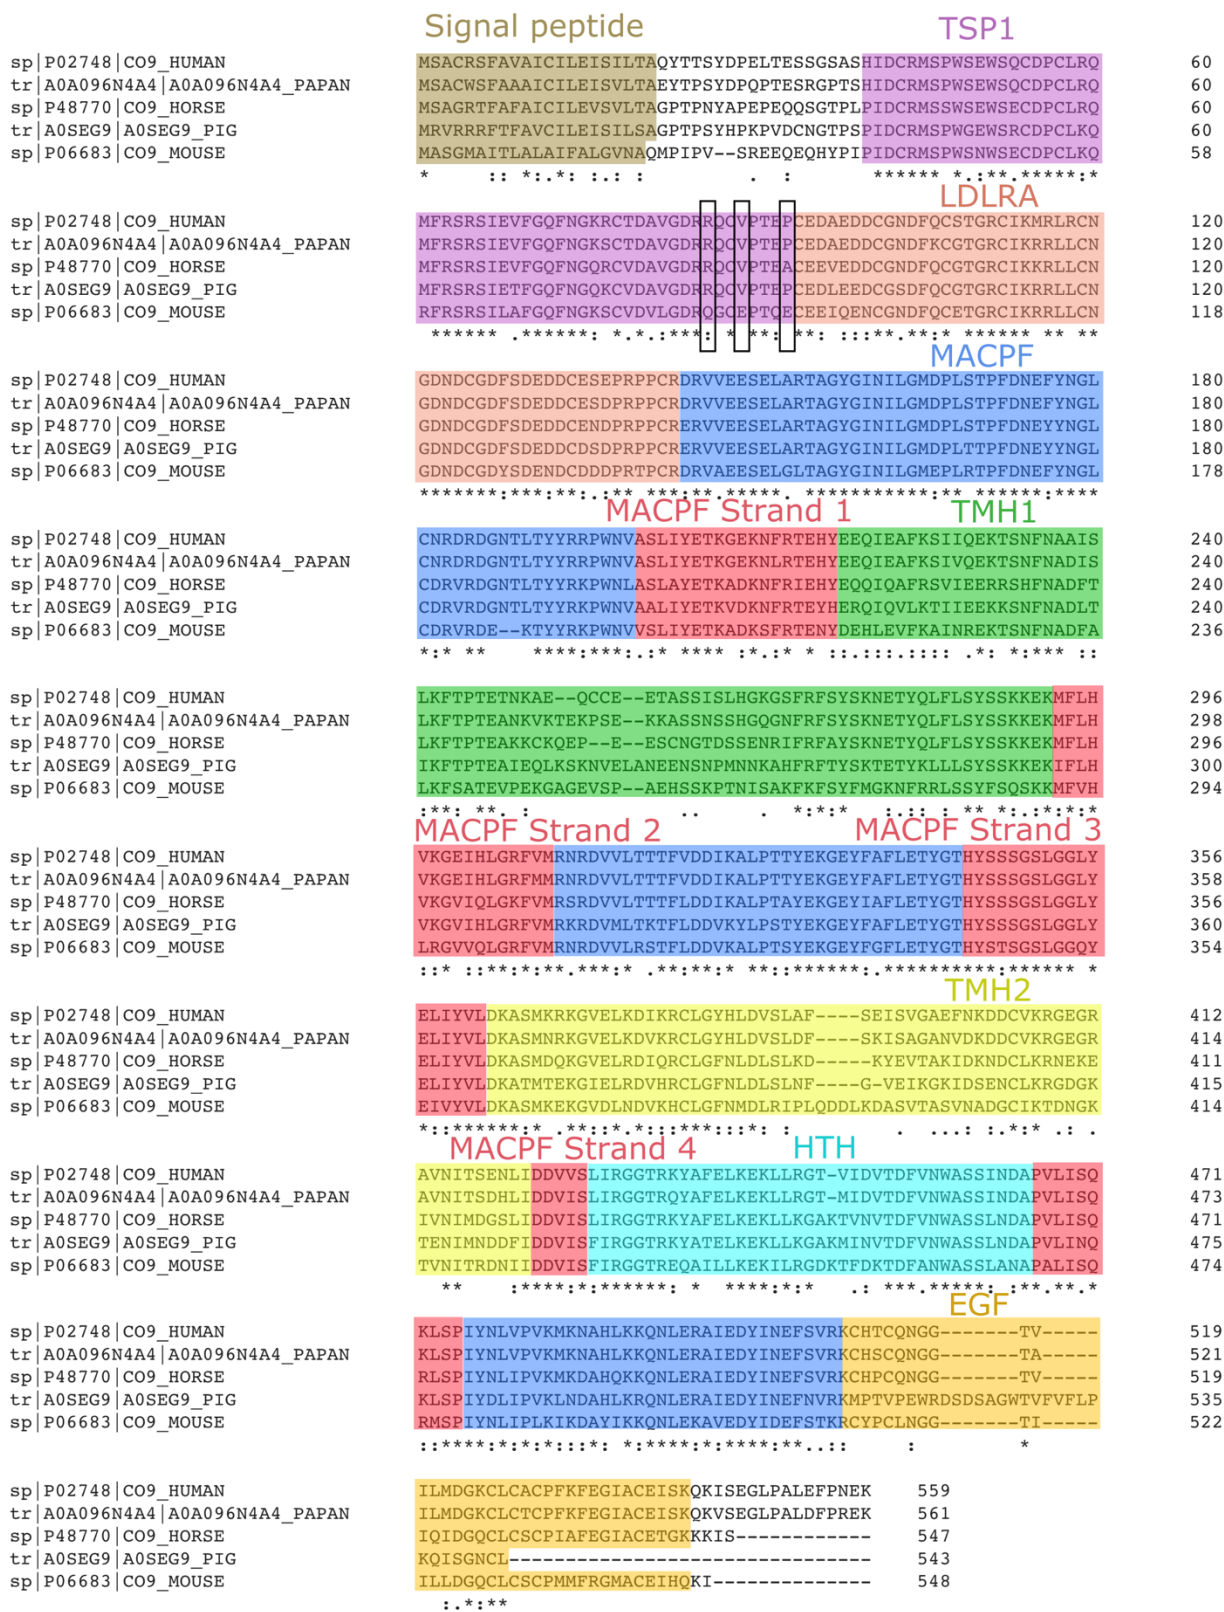

**Supp Figure 4. Multiple sequence alignment of C9 homologs.** Alignment of human, baboon (*Papio anubis*), horse, pig and mouse complement C9. Horizontal box shows signal peptide which is removed during secretion. Vertical boxes show key aE11 contact residues that disrupt binding upon mutation. The residue numbering is shown for the full open reading frame of the C9 gene. TSP1 domain (purple), LDLRA (salmon pink), body of MACPF domain (blue), conserved core  $\beta$ -sheet of MACPF domain (red), TMH1 region of MACPF domain (green), TMH2 region of MACPF Domain (yellow), HTH region of MACPF domain (cyan), and EGF-like domain (orange).

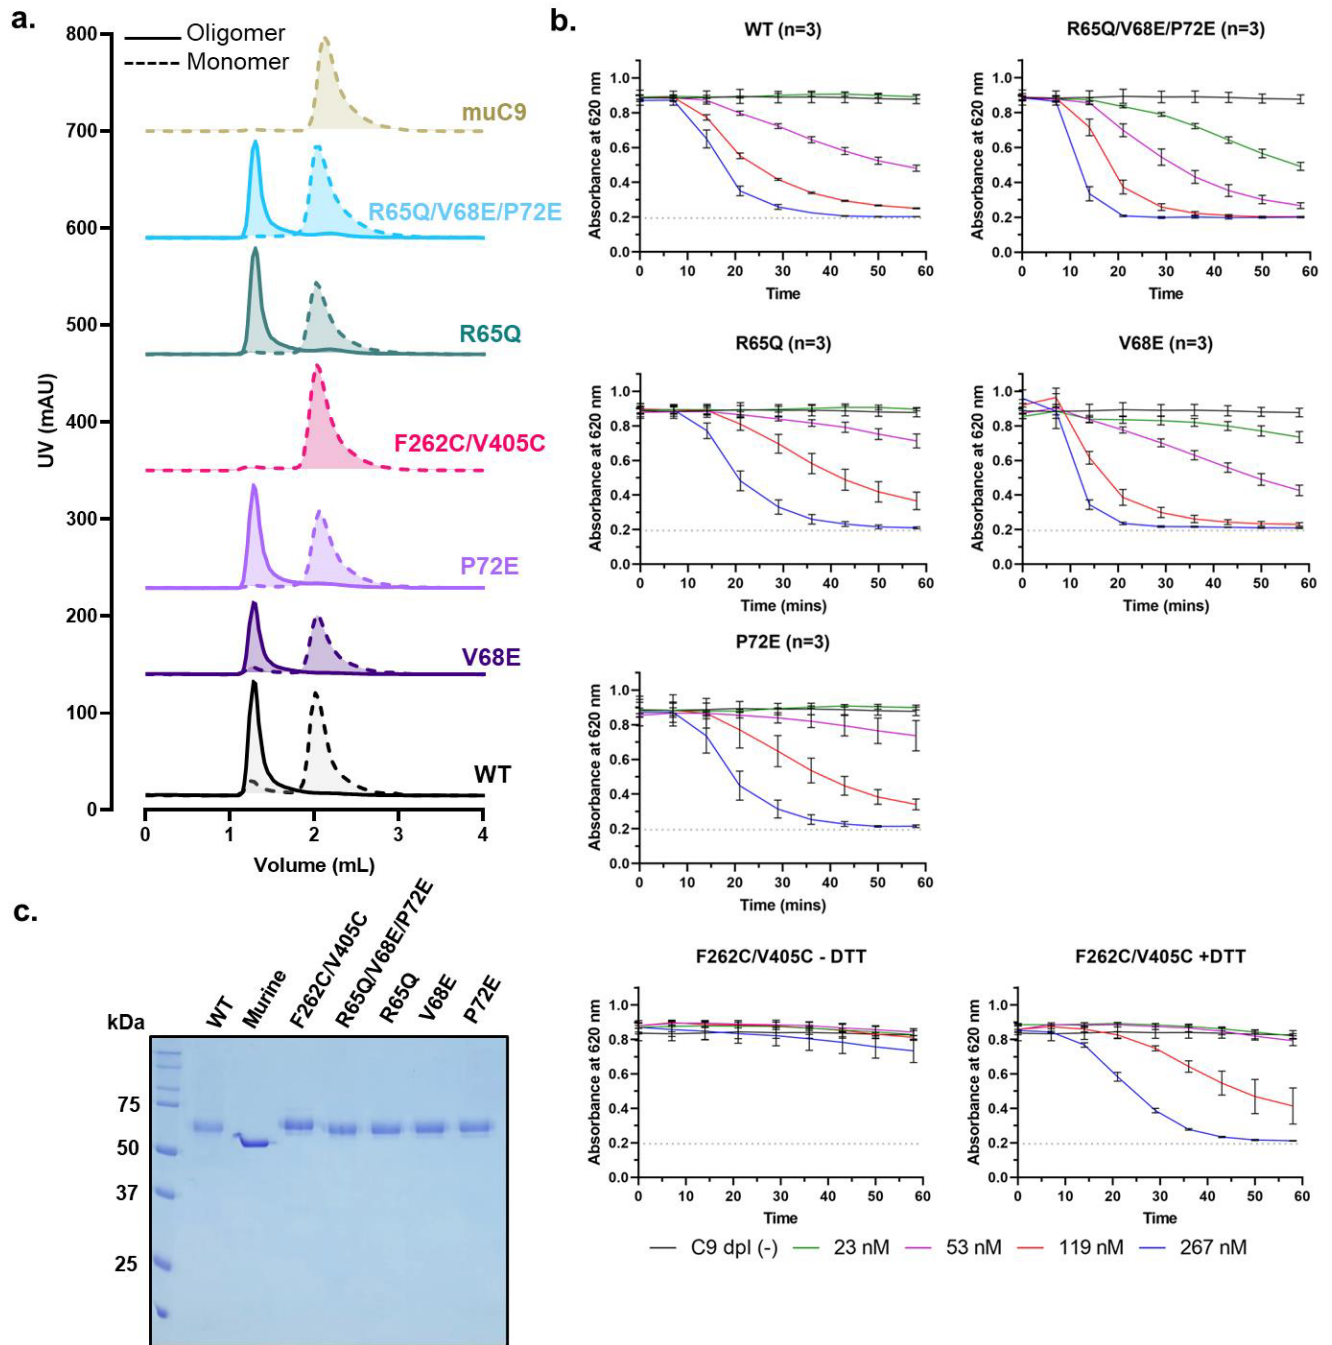

**Supp Figure 5. Functional comparison of C9 variants (monomeric versus polyC9).** **a.** Analytical size-exclusion chromatography of wild-type and variant forms of monomeric and oligomeric C9. Oligomeric C9 elutes in the void volume (~1.2 mL), while monomeric C9 (~2.1 mL) is resolved by the column. **b.** Red blood cell haemolytic time-course assays of MAC assembly with C9 variants (n=3). Concentration-series of wild-type and variant forms of C9 are shown as individual curves. Every tenth data point is shown. All plots are shown as averages, with error bars presented as the standard error of the mean (SEM). The absorbance at 30 minutes was taken for each concentration of C9 to determine the effective half-maximal concentration. The additional experiment of reducing and non-reducing conditions was conducted for the disulphide trapped C9 (F262C/V405C) variant to illustrate inactivity and activity respectively (+DTT is 1 mM final DTT concentration). **c.** Non-reducing SDS-PAGE (12% w/w) of purified recombinant C9 constructs.



— 0.625 nM — 0.3125 nM — 1.25 nM — 2.5 nM — 5 nM — 10 nM — 20 nM

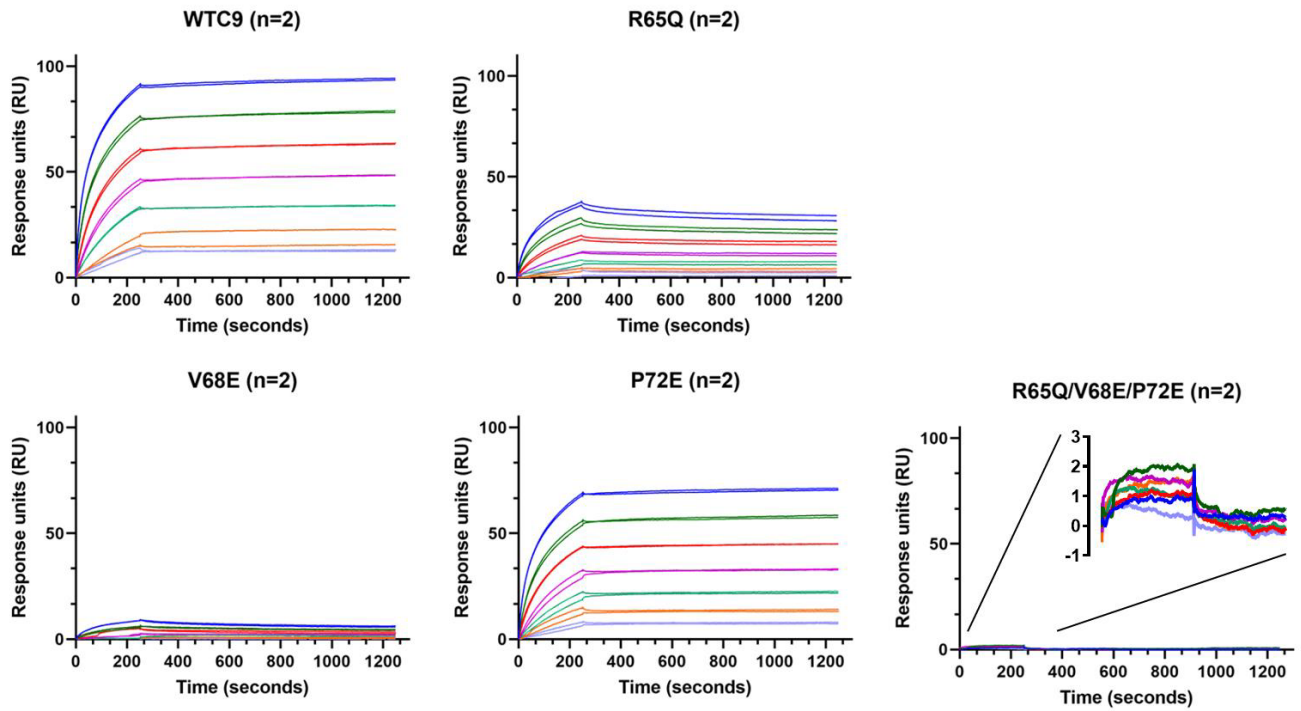

**Supp Figure 6. Raw sensorgrams of polymeric C9 and aE11 interactions.** Binding of different oligomeric C9 variants to full-length aE11 IgG as measured by surface plasmon resonance. PolyC9 reactions were performed overnight prior to analytical size exclusion. Concentrations of polyC9 are outlined in the legend above the sensorgrams.

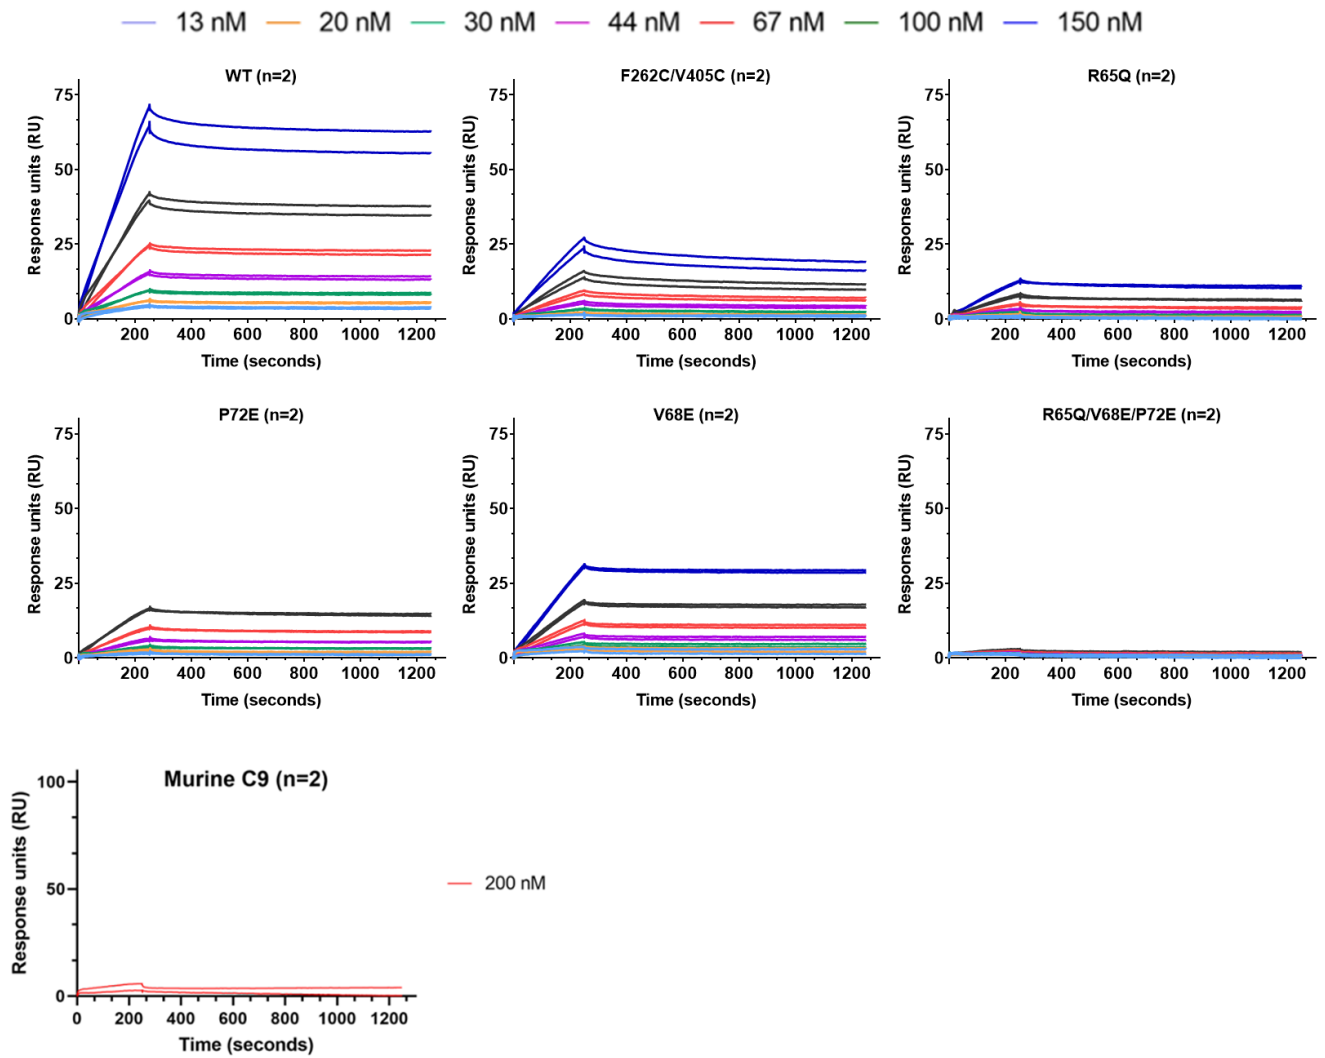

**Supp Figure 7. Raw sensorgrams of monomeric C9 and aE11 interactions.** Binding of different C9 variants to full-length aE11 IgG as measured by surface plasmon resonance. Regeneration steps were performed between each subsequent concentration, as well as between each variant. Concentrations of the C9 analytes at each injection round are coloured consistently between graphs (values shown in legend key). Monomeric murine C9 was applied at 200 nM as a control for non-specific binding.



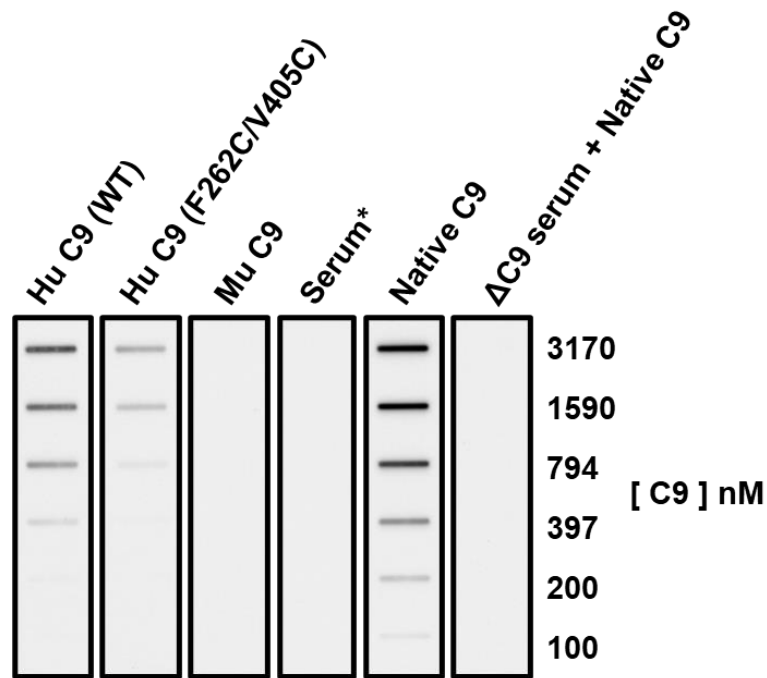

**Supp Figure 8. Slot immunoblot of aE11 binding to monomeric purified C9 or human serum.** A concentration series of human (Hu) and murine (Mu) C9 variants in the monomeric state, serum and C9-depleted serum that was supplemented with recombinant C9 detected by aE11 IgG in a slot immunoblot assay. Native C9 was diluted into C9 depleted serum to a final concentration of 3170 nM, serial dilution was conducted with C9 depleted serum (Comp Tech). (\*) Since C9 concentrations in serum is unknown, it was initially added undiluted and then serially diluted 2-fold; the approximate physiological concentration of monomeric C9 in neat plasma is  $\sim 900 \pm 200 \text{ nM}^{2,3}$ .

**a.**

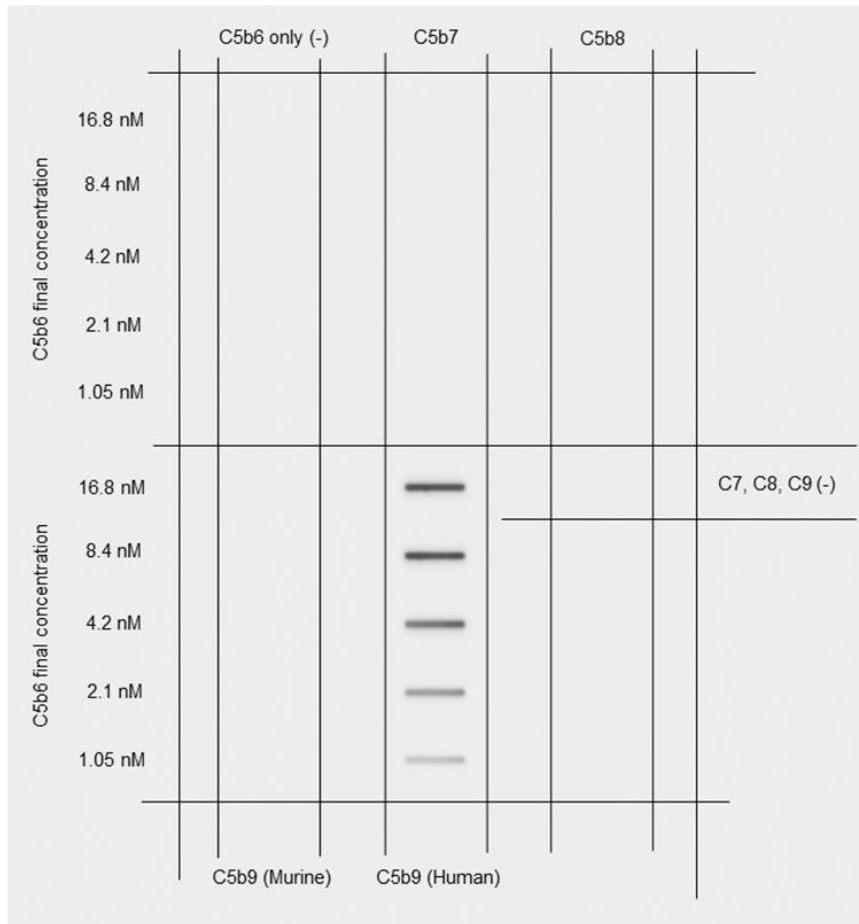

**b.**

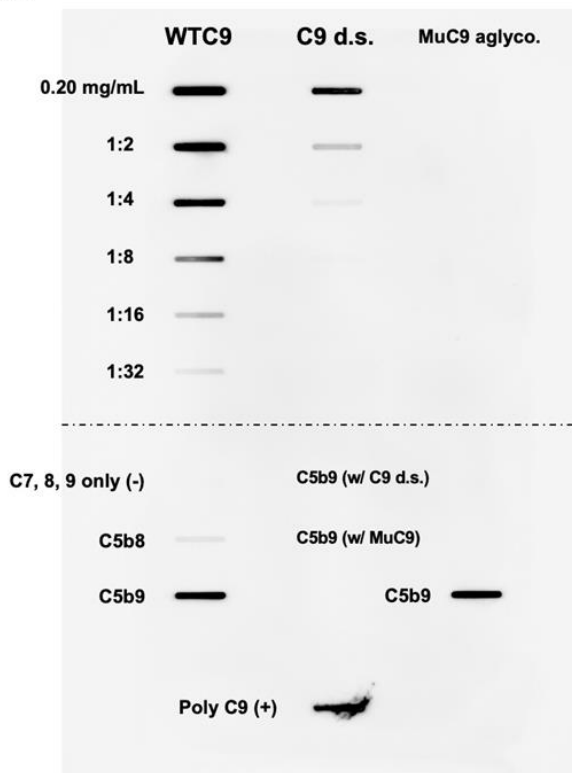

**c.**

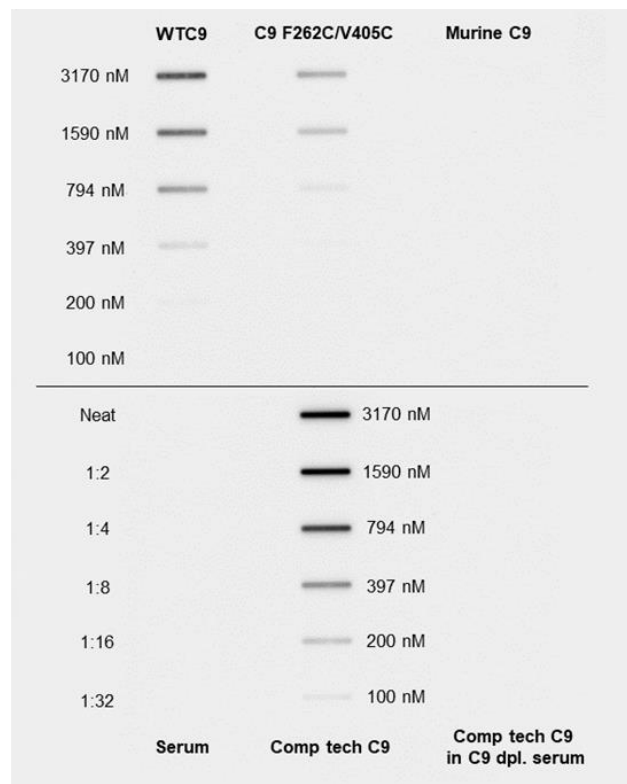

**Supp Figure 9. Uncropped immunoblots.** Corresponding uncropped, unmodified, immunoblots for **a.** Fig 2f, **b.** 4a, and **c.** Supplementary Figure 8.

## References

1. Jumper, J. et al. Highly accurate protein structure prediction with AlphaFold. *Nature* 596, 583-589 (2021).
2. Morgan, P. Chapter 22 - C9. in *The Complement FactsBook (Second Edition)* (eds. Barnum, S. & Schein, T.) 231-237 (Academic Press, 2018).
3. Olesky, D.A. et al. Complement component C9 in Graves' disease. *Clin Endocrinol (Oxf)* 25, 623-32 (1986).

**Supplementary Table 1.** Residue level interactions and contact tables of aE11/C9 neopeptide interface.

| INTERFACE RESIDUES              |        |        |       |             |                  |             |
|---------------------------------|--------|--------|-------|-------------|------------------|-------------|
| Residue                         | Number | ASA    | BSA   | $\Delta^iG$ | Chain            | HDSC* bonds |
| Leading C9 and aE11 heavy chain |        |        |       |             |                  |             |
| PRO                             | 35     | 37.35  | 0.33  | 0.01        | C9 lead          |             |
| THR                             | 70     | 139.08 | 58.56 | 0.38        |                  |             |
| GLU                             | 71     | 101.10 | 74.51 | -0.39       |                  | HS          |
| PRO                             | 72     | 115.73 | 10.69 | 0.17        |                  |             |
| GLU                             | 74     | 132.91 | 23.24 | -0.22       |                  |             |
| ALA                             | 76     | 68.01  | 29.03 | 0.26        |                  | H           |
| GLU                             | 77     | 87.00  | 7.08  | 0.11        |                  |             |
| ASP                             | 78     | 106.48 | 3.34  | -0.04       |                  |             |
| THR                             | 276    | 58.04  | 18.80 | 0.29        |                  |             |
| THR                             | 277    | 91.12  | 26.28 | 0.42        |                  |             |
| LYS                             | 419    | 103.86 | 37.88 | 0.40        |                  |             |
| ASN                             | 420    | 69.06  | 48.01 | -0.28       |                  |             |
| HIS                             | 422    | 127.13 | 33.92 | 0.18        |                  |             |
| LEU                             | 423    | 88.16  | 58.59 | 0.93        |                  |             |
| Lagging C9 and aE11 heavy chain |        |        |       |             |                  |             |
| GLN                             | 20     | 193.65 | 48.01 | -0.21       | aE11 heavy chain |             |
| VAL                             | 21     | 40.61  | 20.33 | 0.33        |                  |             |
| GLY                             | 45     | 56.38  | 7.33  | -0.07       |                  |             |
| PHE                             | 46     | 35.37  | 3.78  | 0.06        |                  |             |
| SER                             | 47     | 61.93  | 5.53  | -0.06       |                  |             |
| THR                             | 49     | 77.31  | 8.18  | 0.02        |                  |             |
| VAL                             | 50     | 85.26  | 66.44 | 0.98        |                  |             |
| TYR                             | 51     | 57.60  | 11.85 | -0.06       |                  |             |
| ASP                             | 73     | 101.35 | 7.82  | -0.02       |                  |             |
| ARG                             | 116    | 34.42  | 12.38 | -0.25       |                  | HS          |
| ARG                             | 118    | 100.60 | 56.85 | -1.55       |                  | H           |
| SER                             | 119    | 43.24  | 32.64 | 0.52        |                  |             |
| TYR                             | 120    | 103.95 | 89.30 | 0.92        |                  | H           |
| TRP                             | 126    | 161.17 | 39.56 | 0.23        |                  |             |
| TYR                             | 129    | 106.17 | 25.38 | -0.17       |                  |             |
| Lagging C9 and aE11 heavy chain |        |        |       |             |                  |             |
| TRP                             | 30     | 70.86  | 8.83  | 0.00        | C9 lag           |             |
| ARG                             | 38     | 127.95 | 7.28  | -0.08       |                  |             |
| MET                             | 40     | 31.50  | 7.20  | 0.12        |                  |             |
| ARG                             | 65     | 116.74 | 74.00 | -1.2        |                  | HS          |
| GLN                             | 66     | 158.03 | 44.31 | -0.14       |                  |             |
| CYS                             | 67     | 22.02  | 12.72 | 0.16        |                  |             |
| VAL                             | 68     | 122.22 | 42.01 | 0.67        |                  |             |
| Lagging C9 and aE11 heavy chain |        |        |       |             |                  |             |
| TRP                             | 71     | 62.91  | 51.86 | 0.83        | aE11 heavy chain |             |
| ASP                             | 73     | 101.35 | 15.76 | -0.14       |                  | HS          |
| SER                             | 75     | 48.72  | 15.24 | -0.10       |                  |             |
| TYR                             | 120    | 103.95 | 14.65 | 0.01        |                  |             |
| GLY                             | 121    | 10.26  | 0.98  | -0.01       |                  |             |
| GLY                             | 122    | 48.24  | 43.20 | -0.12       |                  |             |



|                                 |     |        |       |       |                  |   |
|---------------------------------|-----|--------|-------|-------|------------------|---|
| SER                             | 123 | 72.87  | 35.46 | 0.28  |                  |   |
| SER                             | 124 | 89.49  | 16.92 | -0.10 |                  |   |
| Lagging C9 and aE11 light chain |     |        |       |       |                  |   |
| ARG                             | 38  | 127.95 | 40.78 | -1.00 | C9 lag           | H |
| VAL                             | 68  | 122.22 | 68.43 | 0.85  |                  |   |
| PRO                             | 69  | 19.72  | 17.71 | -0.07 |                  |   |
| THR                             | 70  | 145.06 | 43.14 | 0.29  |                  |   |
| GLU                             | 71  | 109.20 | 1.87  | 0.03  |                  |   |
| PRO                             | 72  | 114.86 | 52.78 | 0.82  |                  |   |
|                                 |     |        |       |       |                  |   |
| HIS                             | 46  | 102.42 | 20.40 | 0.12  | aE11 light chain |   |
| GLY                             | 110 | 32.51  | 2.99  | -0.03 |                  |   |
| ASN                             | 111 | 52.27  | 38.91 | -0.51 |                  | H |
| TYR                             | 112 | 110.22 | 86.57 | 1.04  |                  |   |
| LEU                             | 113 | 148.26 | 70.11 | 0.63  |                  | H |
| PRO                             | 114 | 83.02  | 1.17  | 0.02  |                  |   |
| TYR                             | 115 | 126.98 | 12.39 | -0.07 |                  |   |
| Leading C9 and aE11 light chain |     |        |       |       |                  |   |
| PRO                             | 72  | 115.73 | 30.80 | 0.49  | C9 lead          |   |
| GLU                             | 74  | 132.91 | 56.22 | 0.31  |                  | H |
| ALA                             | 76  | 68.01  | 30.61 | 0.49  |                  |   |
| GLU                             | 77  | 87.00  | 6.08  | -0.01 |                  |   |
| ASP                             | 78  | 106.48 | 29.63 | 0.47  |                  |   |
| ASP                             | 79  | 122.52 | 44.37 | -0.43 |                  | H |
|                                 |     |        |       |       |                  |   |
| TYR                             | 51  | 91.78  | 18.01 | -0.21 | aE11 light chain |   |
| TYR                             | 68  | 77.66  | 41.50 | 0.16  |                  | H |
| TYR                             | 69  | 103.32 | 56.61 | 0.18  |                  | H |
| ARG                             | 72  | 134.89 | 28.54 | -0.49 |                  |   |
| HIS                             | 74  | 76.29  | 16.48 | 0.17  |                  |   |
| SER                             | 75  | 98.62  | 39.41 | 0.22  |                  |   |

| RESIDUE CONTACTS                |         |      |        |          |        |         |      |        |      |
|---------------------------------|---------|------|--------|----------|--------|---------|------|--------|------|
| Chain                           | Residue | Atom | Number | Distance | Chain  | Residue | Atom | Number | Type |
| Leading C9 and aE11 heavy chain |         |      |        |          |        |         |      |        |      |
| C9 lead                         | HIS     | ND1  | 422    | 3.68     | aE11 H | TYR     | OH   | 120    | H    |
| C9 lead                         | GLU     | OE1  | 71     | 3.64     | aE11 H | ARG     | NH1  | 116    | H    |
| C9 lead                         | ALA     | O    | 76     | 3.10     | aE11 H | ARG     | NH2  | 118    | H    |
| C9 lead                         | ASN     | OD1  | 420    | 3.53     | aE11 H | TYR     | N    | 120    | H    |
| C9 lead                         | GLU     | OE1  | 71     | 3.64     | aE11 H | ARG     | NH1  | 116    | S    |
| Lagging C9 and aE11 heavy chain |         |      |        |          |        |         |      |        |      |
| C9 lag                          | ARG     | NH1  | 65     | 3.62     | aE11 H | ASP     | OD2  | 73     | H    |
| C9 lag                          | ARG     | NH1  | 65     | 3.62     | aE11 H | ASP     | OD2  | 73     | S    |
| Lagging C9 and aE11 light chain |         |      |        |          |        |         |      |        |      |
| C9 lag                          | ARG     | NH2  | 38     | 3.17     | aE11 L | ASN     | OD1  | 111    | H    |
| C9 lag                          | PRO     | O    | 69     | 3.66     | aE11 L | LEU     | N    | 113    | H    |
| Leading C9 and aE11 light chain |         |      |        |          |        |         |      |        |      |
| C9 lead                         | ASP     | N    | 79     | 3.19     | aE11 L | TYR     | OH   | 69     | H    |
| C9 lead                         | GLU     | OE2  | 74     | 2.98     | aE11 L | TYR     | OH   | 68     | H    |

**Supplementary table 2.** Oligonucleotide primer sequences for site directed mutagenesis

| <b>Mutation</b>  | <b>Sequence 5'→3' (mutations in bold)</b>                             |
|------------------|-----------------------------------------------------------------------|
| R65Q_f           | CGCTGTGGGAGACAGACA <b>AC</b> AGTGTGTGCCACAGAGCCC                      |
| R65Q_r           | CTGTGGGCACACACTG <b>TT</b> GTCTGTCTCCACAGCGTCGG                       |
| V68E_f           | GAGACAGACGACAGTGT <b>GAG</b> CCCACAGAGCCCTGTGAGG                      |
| V68E_r           | CAGGGCTCTGTGGG <b>CTC</b> ACACTGTCGTCTGTCTCCAC                        |
| P72E_f           | GTGTGCCACAGAG <b>GA</b> ATGTGAGGATGCTGAGGATGACTGCGG                   |
| P72E_r           | CCTCAGCATCCTCAC <b>ATT</b> C CTCTGTGGGCACACACTGTCG                    |
| R65Q/V68E/P72E_f | GACA <b>AC</b> AGTGT <b>GAG</b> CCCACAGAG <b>GA</b> ATGTGAGGATGCTGAGG |
| R65Q/V68E/P72E_r | C <b>ATT</b> CCTCTGTGGG <b>CTC</b> ACACTG <b>TT</b> GTCTGTCTCCACAGCG  |
| F262C_f          | ACTTACCAACTAT <b>G</b> TTTGTTCATATTCTTCAAAG                           |
| F262C_r          | GAAGAATATGACAA <b>AC</b> ATAGTTGGTAAGTTTC                             |
| V405C_f          | CATAGATGATGTT <b>TG</b> TTCACTCATAAGAGGTGG                            |
| V405C_r          | CTCTTATGAGTGA <b>ACA</b> AACATCATCTATGAG                              |

Note primers correspond to codon optimised synthetic gene and may not necessarily reflect the sequence of the endogenous C9 gene.
