# Supplementary material
Source: PubMed Central journal article supplement (PMC9839773)
Supplement: 42003_2023_4431_MOESM3_ESM.pdf [file 42003_2023_4431_MOESM3_ESM.pdf]

## Description of Additional Supplementary Files

**File name:** Supplementary Data 1

**Description:** All source data for figures 1, 2, 3, 4 and 5.
